# Supplementary material for: Predefined attention-focused mechanism using center-environment features: a machine learning study of alloying effects on the stability of Nb 5 Si 3 alloys
Source: Royal Society of Chemistry journal article supplement (doi:10.1039/d5dd00079c), 2025-01-01
Supplement: d5dd00079c1.pdf [file d5dd00079c1.pdf]

**Supplementary information of**

**Predefined attention-focused mechanism using center-environment features:**

**A machine learning study of alloying effects on stability of Nb<sub>5</sub>Si<sub>3</sub> alloys**

Yuchao Tang<sup>1,2</sup>, Bin Xiao<sup>1</sup>, Shuizhou Chen<sup>3</sup>, Quan Qian<sup>3</sup>, and Yi Liu<sup>\*1</sup>

<sup>1</sup>Materials Genome Institute, Shanghai Engineering Research Center for Integrated Circuits and Advanced Display Materials, Shanghai University, Shanghai 200444, China

<sup>2</sup>State Key Laboratory of Functional Materials for Informatics, Shanghai Institute of Micro-system and Information Technology, Chinese Academy of Sciences, Shanghai 200050, China

<sup>3</sup>School of Computer Engineering & Science, Shanghai University, Shanghai, 200444, China

\*Corresponding author: yiliu@shu.edu.cn (Yi Liu)

## Text S1

In this work, the  $E_{SS}$ ,  $E_{DS}$ , and  $\langle \Delta d \rangle$  were calculated respectively. The calculation equations are shown as follows (1-3):

$$E_{SS} = E_{pure+X+Y} + E_{S1} - E_{pure+Y} - E_X \quad (1)$$

$$E_{DS} = E_{pure+X+Y} + E_{S1} + E_{S2} - E_{pure} - E_X - E_Y \quad (2)$$

where  $X$  and  $Y$  are double-site substitution elements in  $\alpha\text{-Nb}_5\text{Si}_3$ .  $E_{pure+X+Y}$  is the total energy of the  $\alpha\text{-Nb}_5\text{Si}_3$  system after double-site substitution calculated by DFT;  $E_{pure+Y}$  is the energy of pristine  $\alpha\text{-Nb}_5\text{Si}_3$  with  $Y$  site substitution elements;  $E_{S1}$  and  $E_{S2}$  are the total energy per atom of pure Nb or Si crystal, respectively.  $E_X$  and  $E_Y$  are the crystalline single-atom energy of each alloying element.

$$\langle \Delta d \rangle = \frac{1}{n} * \sum_{i=1}^n (|r'_i - r'_0| - |r_i - r_0|) \quad (3)$$

where  $\langle \Delta d \rangle$  is the average bond length change of the local structure, the  $r_i$  and  $r'_i$  are positions of substitution elements before and after ion relaxation in the crystal structure, and  $r_0$  and  $r'_0$  are the positions of the  $i$ -th atom in the substitution element's nearest neighbor  $n$  atoms before and after ion relaxation in the crystal structure, respectively.

All computational simulations were conducted utilizing Density Functional Theory (DFT) as integrated within the Vienna Ab-initio Simulation Package (VASP) software[1,2]. We employed the Perdew-Burke-Ernzerhof (PBE) parametrization for the generalized gradient approximation (GGA-PBE) [3,4] to calculate the exchange-correlation energy. The interactions between core and valence electrons were approximated using Projector-Augmented Wave (PAW) potentials. The kinetic energy cutoff for the wave functions was established at 450 eV. For  $\alpha\text{-Nb}_5\text{Si}_3$ , a Gamma-centered k-mesh of  $5 \times 5 \times 3$  was applied to discretize the Brillouin zone (BZ). The total energy calculations were refined to a convergence threshold of  $1 \times 10^{-5}$  eV, while the forces were converged with an accuracy of less than 0.02 eV/Å. Taking into account the dilute concentration of the alloying elements, lattice relaxation was initially carried out within the  $\alpha\text{-Nb}_5\text{Si}_3$  systems. Subsequently, ionic relaxation was executed under the constraint of maintaining a constant cell volume and shape.



**Table S1** Non-equivalent substitution pairs with the corresponding site distances in  $\alpha\text{-Nb}_5\text{Si}_3$  studied in this work.

| System                                                          | Sites                    | Non-equivalent site pair          | Site distance (Å) | Number of systems studied in this work |
|-----------------------------------------------------------------|--------------------------|-----------------------------------|-------------------|----------------------------------------|
| $\alpha\text{-Nb}_5\text{Si}_3$<br>more closely<br>packed layer | Nb <sub>I</sub><br>site  | $X_{\text{NbI}} Y_{\text{SiI}}$   | 2.59              | 196                                    |
|                                                                 |                          | $X_{\text{NbI}} Y_{\text{SiII}}$  | 2.99              | 196                                    |
|                                                                 |                          | $X_{\text{NbI}} Y_{\text{NbII}}$  | 3.05              | 196                                    |
|                                                                 | Si <sub>I</sub><br>site  | $X_{\text{SiI}} Y_{\text{SiI}}$   | 2.42              | 196                                    |
|                                                                 |                          | $X_{\text{SiI}} Y_{\text{NbI}}$   | 2.59              | 196                                    |
|                                                                 |                          | $X_{\text{SiI}} Y_{\text{NbII}}$  | 2.62              | 196                                    |
|                                                                 |                          | $X_{\text{SiI}} Y_{\text{NbII}}$  | 2.66              | 196                                    |
|                                                                 | Nb <sub>II</sub><br>site | $X_{\text{NbII}} Y_{\text{SiI}}$  | 2.62              | 196                                    |
|                                                                 |                          | $X_{\text{NbII}} Y_{\text{SiII}}$ | 2.66              | 196                                    |
|                                                                 |                          | $X_{\text{NbII}} Y_{\text{SiII}}$ | 2.75              | 196                                    |
|                                                                 |                          | $X_{\text{NbII}} Y_{\text{NbII}}$ | 2.88              | 196                                    |
|                                                                 |                          | $X_{\text{NbII}} Y_{\text{NbI}}$  | 3.05              | 196                                    |
|                                                                 |                          | $X_{\text{NbII}} Y_{\text{NbII}}$ | 3.11              | 196                                    |
|                                                                 |                          | $X_{\text{NbII}} Y_{\text{NbII}}$ | 3.26              | 196                                    |
|                                                                 |                          | $X_{\text{NbII}} Y_{\text{NbII}}$ | 3.49              | 196                                    |
|                                                                 |                          | $X_{\text{NbII}} Y_{\text{NbII}}$ | 3.57              | 196                                    |
| $\alpha\text{-Nb}_5\text{Si}_3$ less<br>closely<br>packed layer | Si <sub>II</sub><br>site | $X_{\text{SiII}} Y_{\text{NbII}}$ | 2.75              | 196                                    |
|                                                                 |                          | $X_{\text{SiII}} Y_{\text{NbI}}$  | 2.99              | 196                                    |

**Table S2** Elementary properties used in the feature construction.

| #  | Features                                                    | Abbreviate |             |
|----|-------------------------------------------------------------|------------|-------------|
|    |                                                             | Center     | Environment |
| 1  | Atomic number, start counting left top, left-right sequence | AN_C       | AN_E        |
| 2  | Atomic weight                                               | AW_C       | AW_E        |
| 3  | Charge, nuclear effective (Clementi)                        | CH_C       | CH_E        |
| 4  | Density                                                     | DS_C       | DS_E        |
| 5  | Distance, core electron (Schubert) Molar                    | DC_C       | DC_E        |
| 6  | Distance, valence electron (Schubert) Moment                | DV_C       | DV_E        |
| 7  | Electronegativity (Martynov and Batsanov)                   | EN_C       | EN_E        |
| 8  | Energy, cohesive Brewer                                     | EC_C       | EC_E        |
| 9  | Energy of ionization, first                                 | EI_C       | EI_E        |
| 10 | Enthalpy of melting                                         | EM_C       | EM_E        |
| 11 | Mendeleev Pettifor                                          | MP_C       | MP_E        |
| 12 | Nuclear charge, effective                                   | NC_C       | NC_E        |
| 13 | Quantum number                                              | QN_C       | QN_E        |
| 14 | Radius, covalent                                            | RC_C       | RC_E        |
| 15 | Radius, metal (Waber)                                       | RM_C       | RM_E        |
| 16 | Temperature, melting                                        | TM_C       | TM_E        |
| 17 | Thermal neutron capture cross-section                       | TN_C       | TN_E        |
| 18 | Valence electron number                                     | VE_C       | VE_E        |
| 19 | Bulk modulus                                                | BM_C       | BM_E        |
| 20 | Periodic number                                             | PN_C       | PN_E        |

## Text S2 Chemical composition (CC) feature model

The Chemical Composition (CC) feature model is constructed by the local chemical composition information, excluding the information of crystal structural[5]. This approach is also applied to model the chemical composition of double-site substitutions in  $\alpha$ -Nb<sub>5</sub>Si<sub>3</sub>.

Similar to the construction of the Center-Environment (CE) features, the CC feature model can be expressed as follows.

$$D = [D_1, \dots, D_i, \dots, D_n, T], (e.g., n = 20) \quad (4)$$

$$D_i = [d_{C,i}, d_{E,i}], i = 1, 2, \dots, n \quad (5)$$

$$d_{C,i} = p_{C,i} \quad (6)$$

$$d_{E,i} = \sum_{j=1}^N \omega_{E,j} p_{E,j,i} \quad (7)$$

$$\omega_{E,j} = \frac{r_j^m}{\sum_{j=1}^N r_j^m} (m = 0) \quad (8)$$

where  $p_{E,j,i}$  is the  $i$ -th property of the  $j$ -th environment atom. When  $m=0$ ,  $\omega_{E,j}$  is essentially a normalized factor so that the local chemical composition is naturally taken into account after the summation over all local environment atoms.

### Text S3

In this study, after establishing modeling algorithms for both supporting vector regression and random forest regression, the next step was to enhance model performance through hyper-parameter optimization. Given that each method possesses a multitude of tunable hyper-parameters, a comprehensive exploration of each would demand substantial computational resources. To address this, we conducted a series of iterative experiments, ultimately deciding to employ a grid search optimization approach for a select set of critical parameters. This strategy effectively identified the optimal configuration. The parameters that underwent optimization are detailed in the list that follows.

**Table S3** Modeling hyper-parameter optimization candidates

| Regression algorithm            | Parameter List                                                                                  |
|---------------------------------|-------------------------------------------------------------------------------------------------|
| Support Vector Regression (SVR) | C: 0.1, 1, 10, 100,1000<br><br>kernel: RBF<br><br>gamma: 0.001, 0.01, 0.1, 0.5                  |
| Random Forest (RF)              | n_estimators: 20, 50, 70<br><br>max_depth: 3, 4, 5, 7, 10<br><br>min_samples_split: 2, 4, 6, 10 |

**Table S4** Prediction performance of  $\alpha$ -Nb<sub>5</sub>Si<sub>3</sub> by the CE<sub>NN</sub> model with different

weights  $r_j^m$  ( $m = -1, -\frac{1}{2}$ ).

| Target property              | Performance metric | CE <sub>NN</sub> ( $\omega_j = 1/r$ ) |        |        |        | CE <sub>NN</sub> ( $\omega_j = 1/\sqrt{r}$ ) |        |        |        |
|------------------------------|--------------------|---------------------------------------|--------|--------|--------|----------------------------------------------|--------|--------|--------|
|                              |                    | SVR                                   |        | RF     |        | SVR                                          |        | RF     |        |
|                              |                    | Train                                 | Test   | Train  | Test   | Train                                        | Test   | Train  | Test   |
| E <sub>SS</sub><br>(meV)     | R <sup>2</sup>     | 0.90                                  | 0.89   | 0.92   | 0.82   | 0.94                                         | 0.92   | 0.94   | 0.85   |
|                              | MAE                | 383.27                                | 421.79 | 397.37 | 612.24 | 323.82                                       | 345.37 | 351.95 | 528.40 |
|                              | RMSE               | 586.46                                | 641.44 | 513.06 | 808.46 | 481.81                                       | 487.05 | 451.69 | 692.18 |
| E <sub>DS</sub><br>(meV)     | R <sup>2</sup>     | 0.91                                  | 0.90   | 0.87   | 0.81   | 0.93                                         | 0.92   | 0.91   | 0.82   |
|                              | MAE                | 352.27                                | 384.36 | 493.55 | 638.43 | 327.84                                       | 372.95 | 417.26 | 573.34 |
|                              | RMSE               | 531.66                                | 560.77 | 632.19 | 803.57 | 486.23                                       | 524.68 | 533.91 | 750.93 |
| <Δd><br>(10 <sup>-2</sup> Å) | R <sup>2</sup>     | 0.77                                  | 0.72   | 0.88   | 0.74   | 0.81                                         | 0.75   | 0.86   | 0.75   |
|                              | MAE                | 6.29                                  | 7.99   | 6.04   | 8.0    | 6.83                                         | 10.90  | 6.53   | 9.62   |
|                              | RMSE               | 11.59                                 | 13.23  | 8.49   | 11.90  | 11.44                                        | 11.99  | 9.33   | 11.60  |



**Table S5** Prediction performance of  $\alpha$ -Nb<sub>5</sub>Si<sub>3</sub> by the CE<sub>AET</sub> model with different

weights  $r_j^m$  ( $m = -1, -\frac{1}{2}$ ).

| Target property              | Performance metric | CE <sub>AET</sub> ( $\omega_j = 1/r$ ) |        |        |        | CE <sub>AET</sub> ( $\omega_j = 1/\sqrt{r}$ ) |        |        |        |
|------------------------------|--------------------|----------------------------------------|--------|--------|--------|-----------------------------------------------|--------|--------|--------|
|                              |                    | SVR                                    |        | RF     |        | SVR                                           |        | RF     |        |
|                              |                    | Train                                  | Test   | Train  | Test   | Train                                         | Test   | Train  | Test   |
| E <sub>ss</sub><br>(meV)     | R <sup>2</sup>     | 0.96                                   | 0.95   | 0.95   | 0.89   | 0.95                                          | 0.94   | 0.95   | 0.90   |
|                              | MAE                | 258.01                                 | 278.65 | 328.10 | 480.17 | 277.99                                        | 324.68 | 320.46 | 471.96 |
|                              | RMSE               | 397.44                                 | 409.86 | 425.08 | 627.95 | 414.46                                        | 459.52 | 415.82 | 621.26 |
| E <sub>DS</sub><br>(meV)     | R <sup>2</sup>     | 0.95                                   | 0.93   | 0.86   | 0.81   | 0.94                                          | 0.93   | 0.95   | 0.89   |
|                              | MAE                | 276.74                                 | 329.43 | 486.73 | 578.16 | 317.95                                        | 339.29 | 309.98 | 506.63 |
|                              | RMSE               | 416.49                                 | 465.83 | 675.40 | 780.35 | 476.85                                        | 498.75 | 393.20 | 661.31 |
| <Δd><br>(10 <sup>-2</sup> Å) | R <sup>2</sup>     | 0.80                                   | 0.72   | 0.85   | 0.74   | 0.85                                          | 0.74   | 0.84   | 0.74   |
|                              | MAE                | 6.37                                   | 7.50   | 6.29   | 7.81   | 7.04                                          | 8.20   | 7.76   | 7.80   |
|                              | RMSE               | 10.80                                  | 12.01  | 11.19  | 13.92  | 11.19                                         | 13.92  | 10.96  | 15.16  |

**Table S6** Prediction performance of  $\alpha$ -Nb<sub>5</sub>Si<sub>3</sub> by the CC model.

| Target property              | Performance metric | CC model |         |         |         |
|------------------------------|--------------------|----------|---------|---------|---------|
|                              |                    | SVR      |         | RF      |         |
|                              |                    | Train    | Test    | Train   | Test    |
| E <sub>SS</sub><br>(meV)     | R <sup>2</sup>     | 0.32     | 0.29    | 0.33    | 0.32    |
|                              | MAE                | 1228.03  | 1266.92 | 1210.74 | 1298.51 |
|                              | RMSE               | 1545.38  | 1624.56 | 1535.84 | 1545.96 |
| E <sub>DS</sub><br>(meV)     | R <sup>2</sup>     | 0.67     | 0.65    | 0.71    | 0.68    |
|                              | MAE                | 667.86   | 810.91  | 684.61  | 829.79  |
|                              | RMSE               | 1029.65  | 1084.57 | 970.28  | 1020.40 |
| <Δd><br>(10 <sup>-2</sup> Å) | R <sup>2</sup>     | 0.48     | 0.46    | 0.49    | 0.35    |
|                              | MAE                | 11.43    | 13.33   | 11.57   | 12.69   |
|                              | RMSE               | 16.93    | 20.79   | 16.90   | 19.11   |

**Table S7** GCN Model Parameter Settings

| Parameter | Value    | Description                                                            | Scope                 |
|-----------|----------|------------------------------------------------------------------------|-----------------------|
| nfeat     | 32       | Input node feature dimension ( <i>din</i> )                            | All graphs            |
| nhid      | 64       | Hidden layer dimension of the first GCN layer ( <i>dhid</i> )          | All graphs            |
| nclass    | 16       | Output dimension of the second GCN layer ( <i>dmid</i> )               | Intermediate layer    |
| node_num  | 100      | Fixed number of nodes per graph (NN)                                   | All graphs            |
| nout      | 1        | Final output dimension of the model ( <i>dout</i> )                    | Fully connected layer |
| readout   | "linear" | Graph-level feature aggregation strategy (options: "mean" or "linear") | Entire graph          |
| dropout   | 0.5      | Dropout rate for regularization (applied during training)              | Training phase        |

**Table S8** GAT Model Parameter Settings

| Parameter    | Value | Description                                                        | Scope                             |
|--------------|-------|--------------------------------------------------------------------|-----------------------------------|
| in_features  | 64    | Input feature dimension (din)                                      | Node-level                        |
| out_features | 32    | Output feature dimension(dout)                                     | Node-level                        |
| dropout      | 0.6   | Dropout rate for randomly masking attention weights                | Training phase                    |
| node_num     | 0.2   | Negative slope coefficient for LeakyReLU activation                | Attention coefficient computation |
| alpha        | True  | Whether to apply ELU activation and concatenate multi-head outputs | Node-level                        |

## ALIGNN model Parameter

**Table S9** RBFExpansion Parameter Settings

| Parameter   | Value | Description                                                                                           | Type  |
|-------------|-------|-------------------------------------------------------------------------------------------------------|-------|
| vmin        | 0     | Minimum value of RBF centers<br>(normalized input range, e.g., bond lengths)                          | float |
| vmax        | 8     | Maximum value of RBF centers<br>(normalized input range, e.g., bond lengths)                          | float |
| bins        | 40    | Number of RBF centers (controls feature resolution)                                                   | int   |
| lengthscale | None  | Width parameter ( $\sigma$ ) of Gaussian kernels.<br>If None, auto-calculated as $(vmax - vmin)/bins$ | float |

**Table S10** ALIGNN Key Parameter Settings

| Parameter              | Value | Description                                                                    | Type |
|------------------------|-------|--------------------------------------------------------------------------------|------|
| triplet_input_features | 32    | Dimension of angle features after RBF embedding (matches bins in RBFExpansion) | int  |
| hidden_dim             | 64    | Hidden layer dimension of graph convolution layers (controls model capacity)   | int  |
| num_conv_layers        | 5     | Number of alternating graph convolution iterations (atom-line graph updates)   | int  |

**Table S11** Prediction results of substitution energies in  $\alpha$ -Nb<sub>5</sub>Si<sub>3</sub> using different machine learning algorithms.

| Sites                           | Target          | Performance metric | GBR    | LGBM   | XGB    |
|---------------------------------|-----------------|--------------------|--------|--------|--------|
| Nb <sub>I</sub>                 | E <sub>SS</sub> | R <sup>2</sup>     | 0.88   | 0.922  | 0.923  |
|                                 |                 | RMSE               | 529.69 | 419.72 | 418.04 |
|                                 |                 | MAE                | 359.52 | 328.22 | 338.33 |
|                                 | E <sub>DS</sub> | R <sup>2</sup>     | 0.933  | 0.893  | 0.934  |
|                                 |                 | RMSE               | 387.08 | 508.52 | 383.85 |
|                                 |                 | MAE                | 282.70 | 345.70 | 287.98 |
| Nb <sub>II</sub>                | E <sub>SS</sub> | R <sup>2</sup>     | 0.879  | 0.854  | 0.884  |
|                                 |                 | RMSE               | 430.90 | 498.96 | 467.76 |
|                                 |                 | MAE                | 307.34 | 384.92 | 340.12 |
|                                 | E <sub>DS</sub> | R <sup>2</sup>     | 0.928  | 0.919  | 0.900  |
|                                 |                 | RMSE               | 397.78 | 421.95 | 481.78 |
|                                 |                 | MAE                | 291.22 | 308.54 | 331.23 |
| Si <sub>I</sub>                 | E <sub>SS</sub> | R <sup>2</sup>     | 0.962  | 0.956  | 0.969  |
|                                 |                 | RMSE               | 508.38 | 543.84 | 459.77 |
|                                 |                 | MAE                | 341.02 | 373.56 | 326.41 |
|                                 | E <sub>DS</sub> | R <sup>2</sup>     | 0.963  | 0.928  | 0.960  |
|                                 |                 | RMSE               | 421.91 | 584.23 | 434.43 |
|                                 |                 | MAE                | 306.75 | 434.21 | 317.17 |
| Si <sub>II</sub>                | E <sub>SS</sub> | R <sup>2</sup>     | 0.874  | 0.855  | 0.877  |
|                                 |                 | RMSE               | 445.99 | 597.58 | 557.02 |
|                                 |                 | MAE                | 279.73 | 448.18 | 383.81 |
|                                 | E <sub>DS</sub> | R <sup>2</sup>     | 0.906  | 0.911  | 0.923  |
|                                 |                 | RMSE               | 520.96 | 591.88 | 542.28 |
|                                 |                 | MAE                | 333.85 | 445.23 | 378.25 |
| Nb <sub>5</sub> Si <sub>3</sub> | E <sub>SS</sub> | R <sup>2</sup>     | 0.954  | 0.941  | 0.949  |
|                                 |                 | RMSE               | 451.12 | 500.80 | 461.58 |
|                                 |                 | MAE                | 311.43 | 362.87 | 324.63 |
|                                 | E <sub>DS</sub> | R <sup>2</sup>     | 0.934  | 0.925  | 0.937  |
|                                 |                 | RMSE               | 521.98 | 529.91 | 512.91 |
|                                 |                 | MAE                | 348.53 | 386.75 | 372.60 |

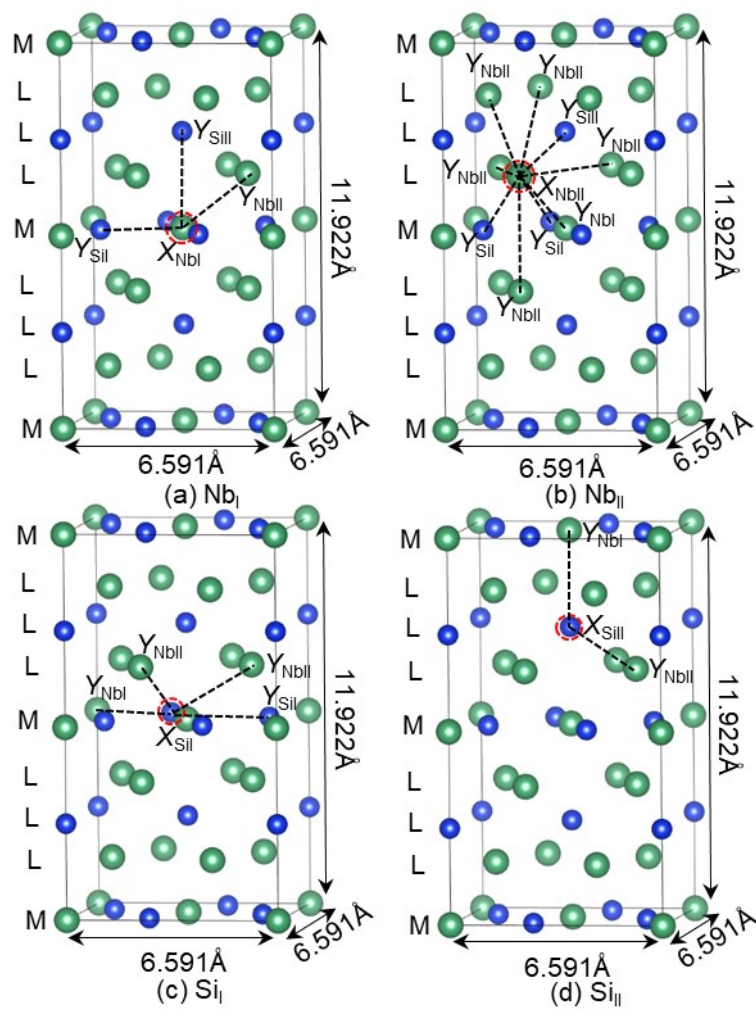

**Fig. S1** The non-equivalent substitution sites of  $\alpha$ -Nb<sub>5</sub>Si<sub>3</sub> (a) Nb<sub>I</sub>, (b) Si<sub>I</sub>, (c) Nb<sub>II</sub>, and (d) Si<sub>II</sub>.

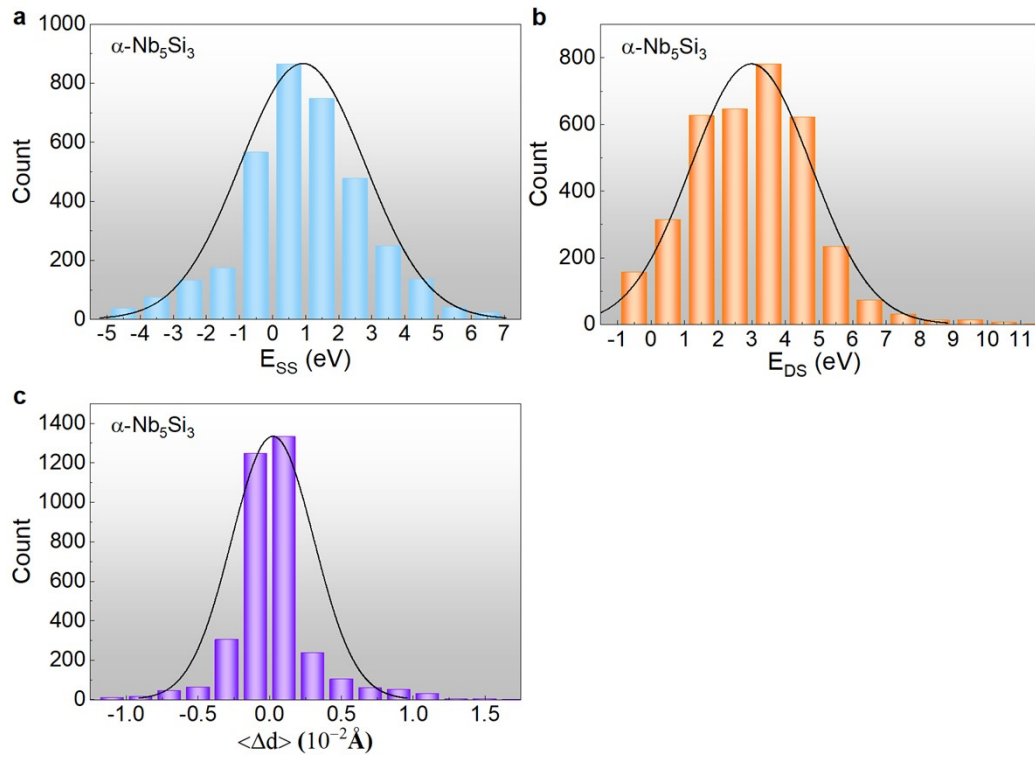

**Fig. S2** Statistical plots of target data ( $E_{\text{SS}}$ ,  $E_{\text{DS}}$ , and  $\langle \Delta d \rangle$ ), where (a)-(c) were for the substitution of alloying elements in  $\alpha\text{-Nb}_5\text{Si}_3$ .



|    |    |    |    |    |    |    |    |    |    |    |    |    |    |    |    |    |    |
|----|----|----|----|----|----|----|----|----|----|----|----|----|----|----|----|----|----|
| H  |    |    |    |    |    |    |    |    |    |    |    |    |    |    |    |    | He |
| Li | Be |    |    |    |    |    |    |    |    |    |    | B  | C  | N  | O  | F  | Ne |
| Na | Mg |    |    |    |    |    |    |    |    |    |    | Al | Si | P  | S  | Cl | Ar |
| K  | Ca | Sc | Ti | V  | Cr | Mn | Fe | Co | Ni | Cu | Zn | Ga | Ge | As | Se | Br | Kr |
| Rb | Sr | Y  | Zr | Nb | Mo | Tc | Ru | Rh | Pd | Ag | Cd | In | Sn | Sb | Te | I  | Xe |
| Cs | Ba | *  | Hf | Ta | W  | Re | Os | Ir | Pt | Au | Hg | Tl | Pb | Bi | Po | At | Rn |

(g)

**Fig. S3** The distribution of the 14 substituted alloying elements in the periodic table for the  $\alpha$ -Nb<sub>5</sub>Si<sub>3</sub> structures, with dark green representing the substitution elements.

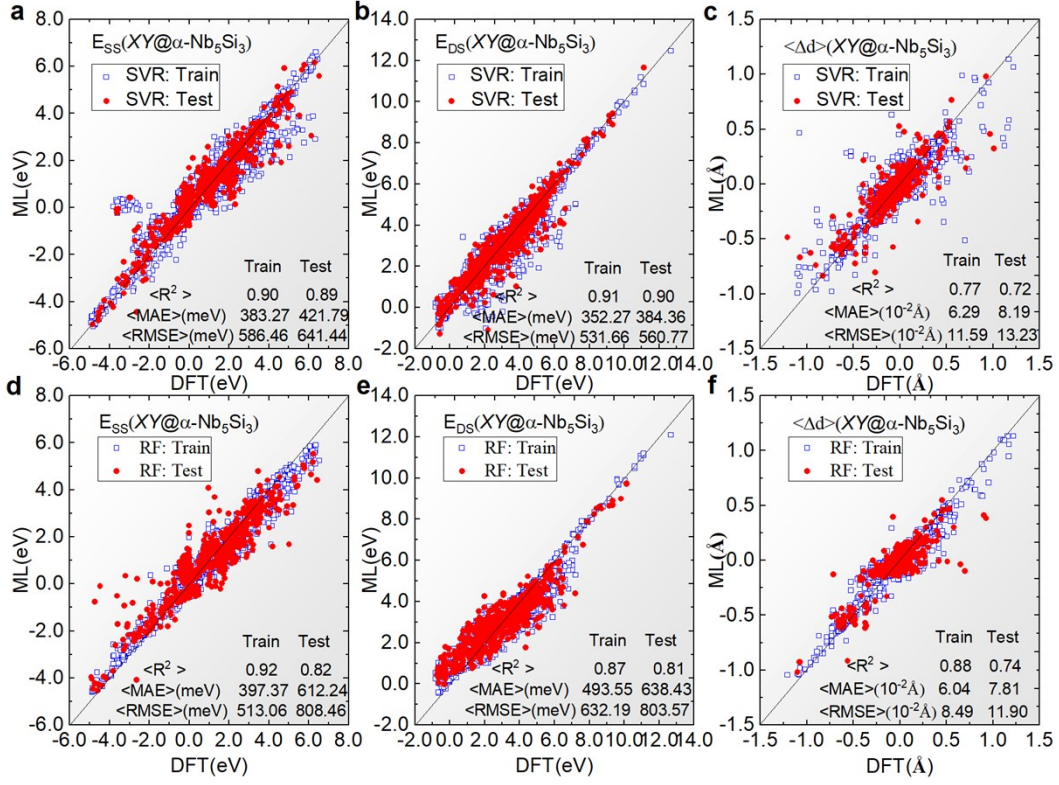

**Fig. S4** (a, d)  $E_{\text{SS}}$ , (b, e)  $E_{\text{DS}}$ , (c, f)  $\langle \Delta d \rangle$  of  $\alpha\text{-Nb}_5\text{Si}_3$  predicted by the  $\text{CE}_{\text{NN}}$  models with SVR and RF algorithms with  $\omega_j = 1/r$ .

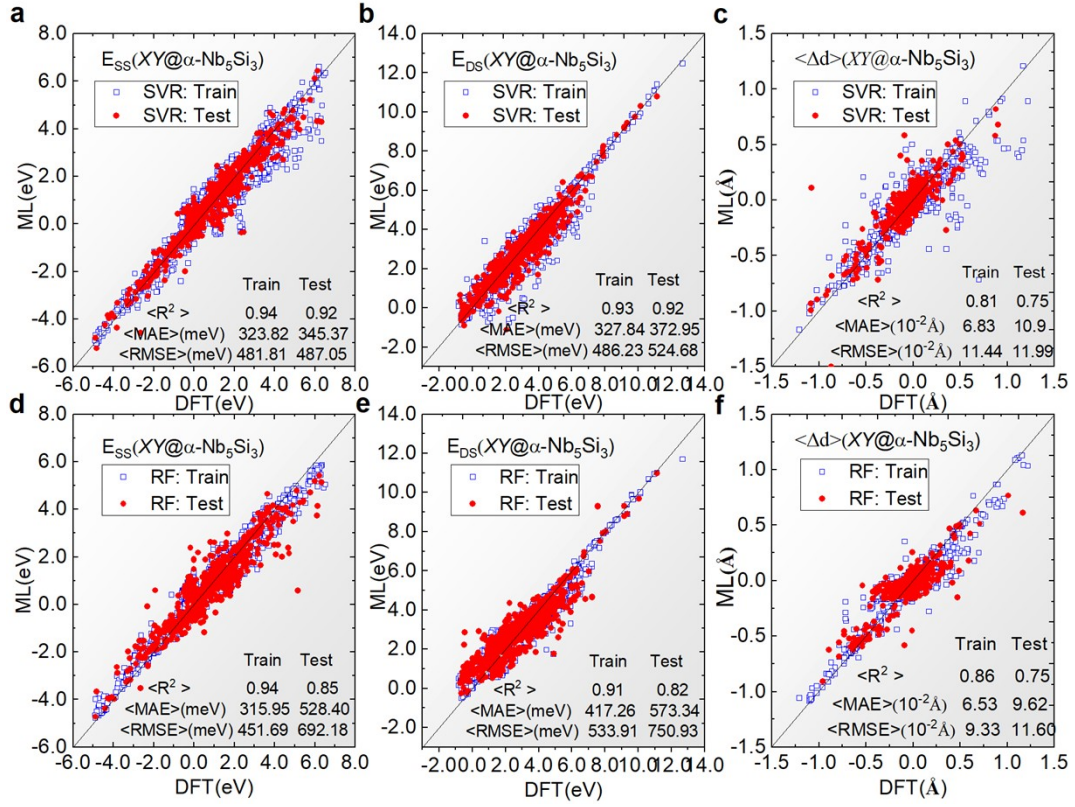

**Fig. S5** (a, d)  $E_{SS}$ , (b, e)  $E_{DS}$ , (c, f)  $\langle \Delta d \rangle$  of  $\alpha\text{-Nb}_5\text{Si}_3$  predicted by the  $\text{CE}_{NN}$  models with SVR and RF algorithms with  $\omega_j = 1/\sqrt{r}$ .

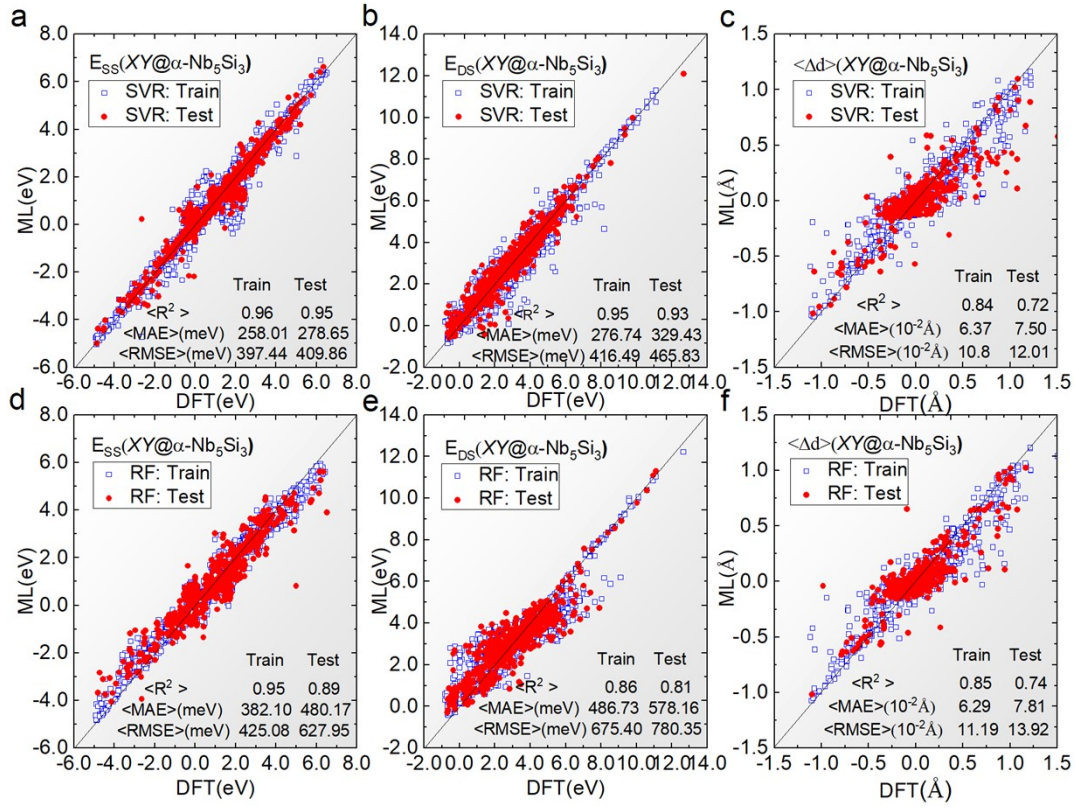

**Fig. S6** (a, d)  $E_{\text{SS}}$ , (b, e)  $E_{\text{DS}}$ , (c, f)  $\langle \Delta d \rangle$  of  $\alpha\text{-Nb}_5\text{Si}_3$  predicted by the  $\text{CE}_{\text{AET}}$  models with SVR and RF algorithms with  $\omega_j = 1/r$ .

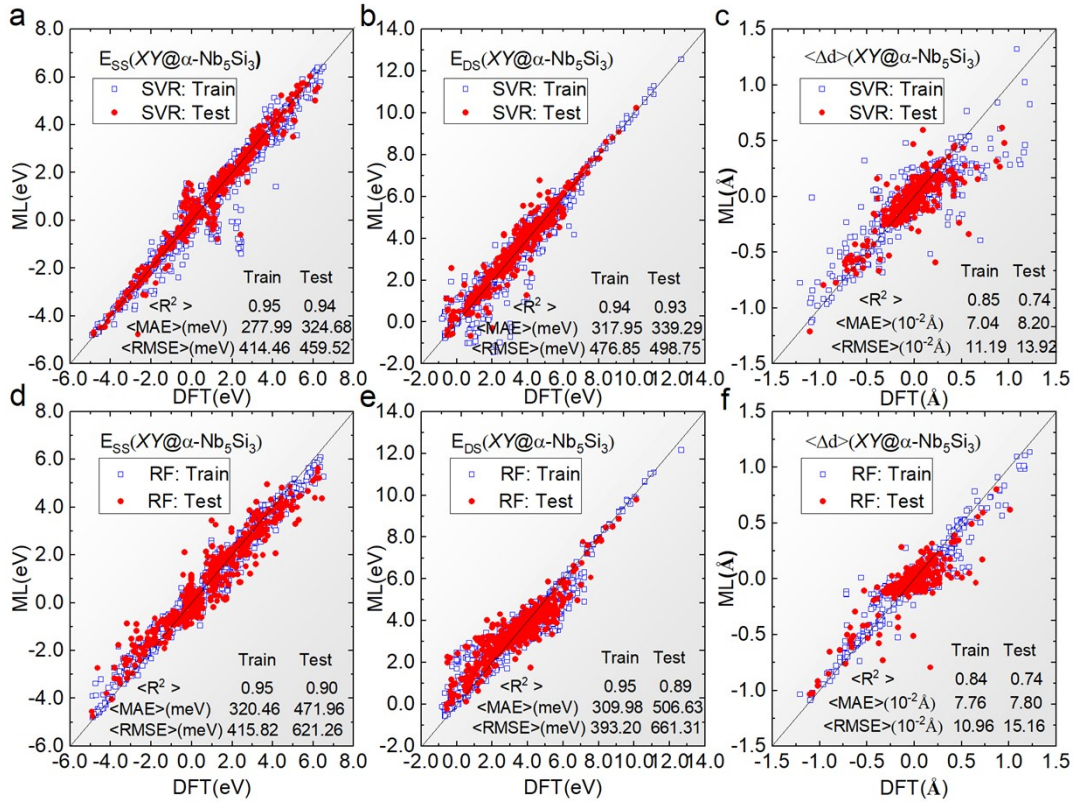

**Fig. S7** (a, d)  $E_{\text{SS}}$ , (b, e)  $E_{\text{DS}}$ , (c, f)  $\langle \Delta d \rangle$  of  $\alpha\text{-Nb}_5\text{Si}_3$  predicted by the  $\text{CE}_{\text{AET}}$  models with SVR and RF algorithms with  $\omega_j = 1/\sqrt{r}$ .



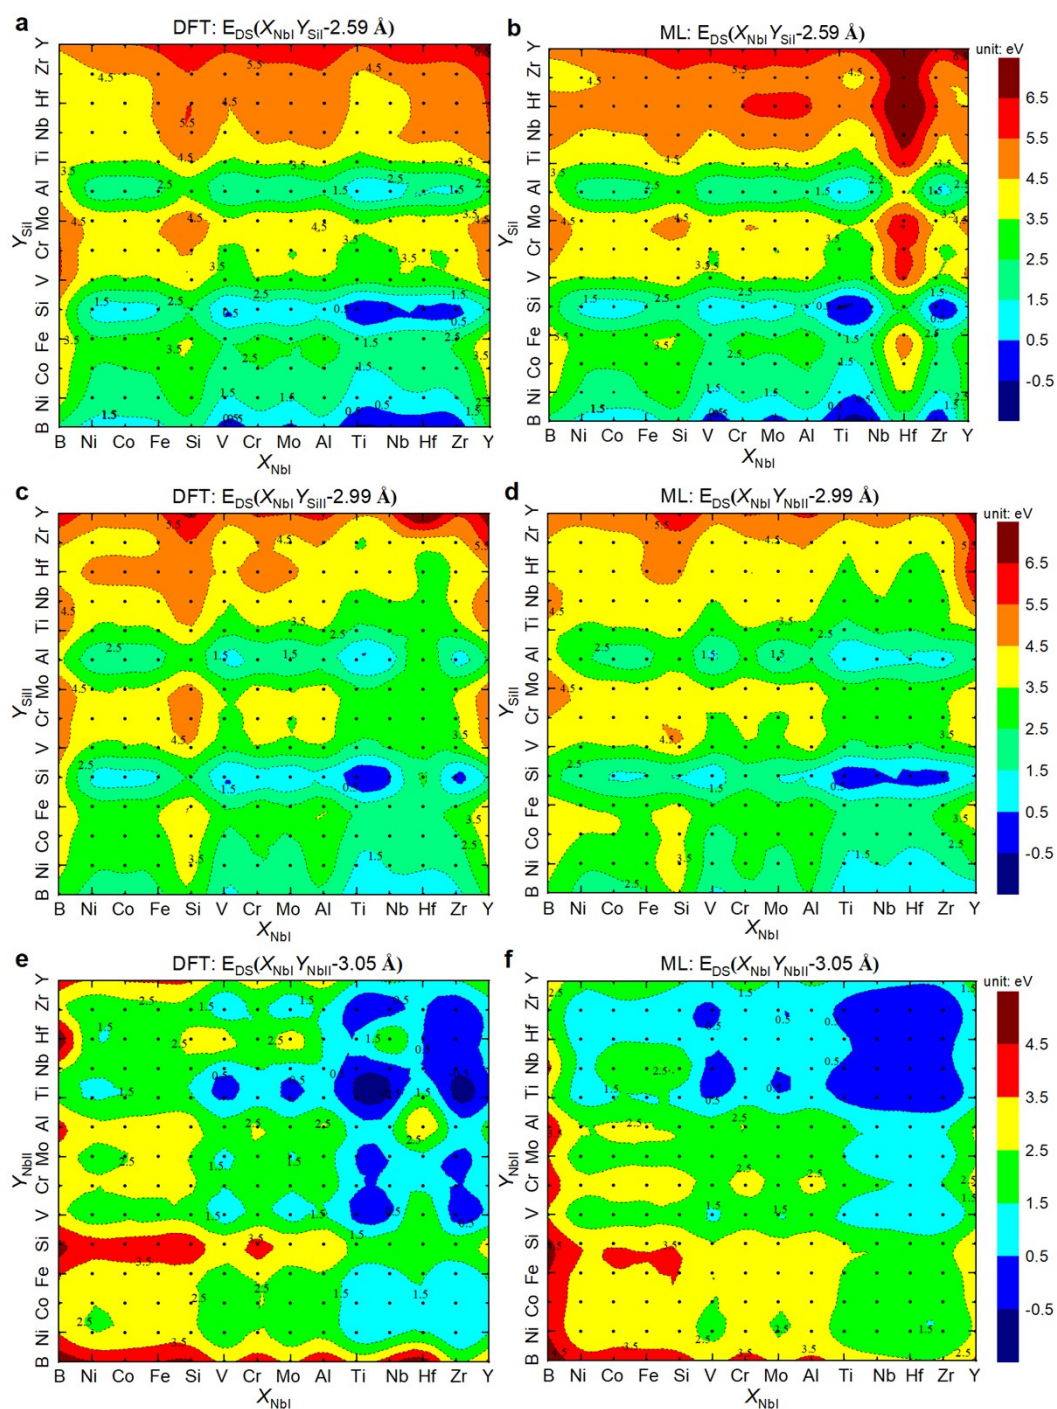

**Fig. S8** Heat maps of  $E_{DS}$  projected on the substitution pair sites containing Nb in  $\alpha$ -Nb<sub>5</sub>Si<sub>3</sub> predicted by (a, c, e) DFT and (b, d, f) ML, respectively.

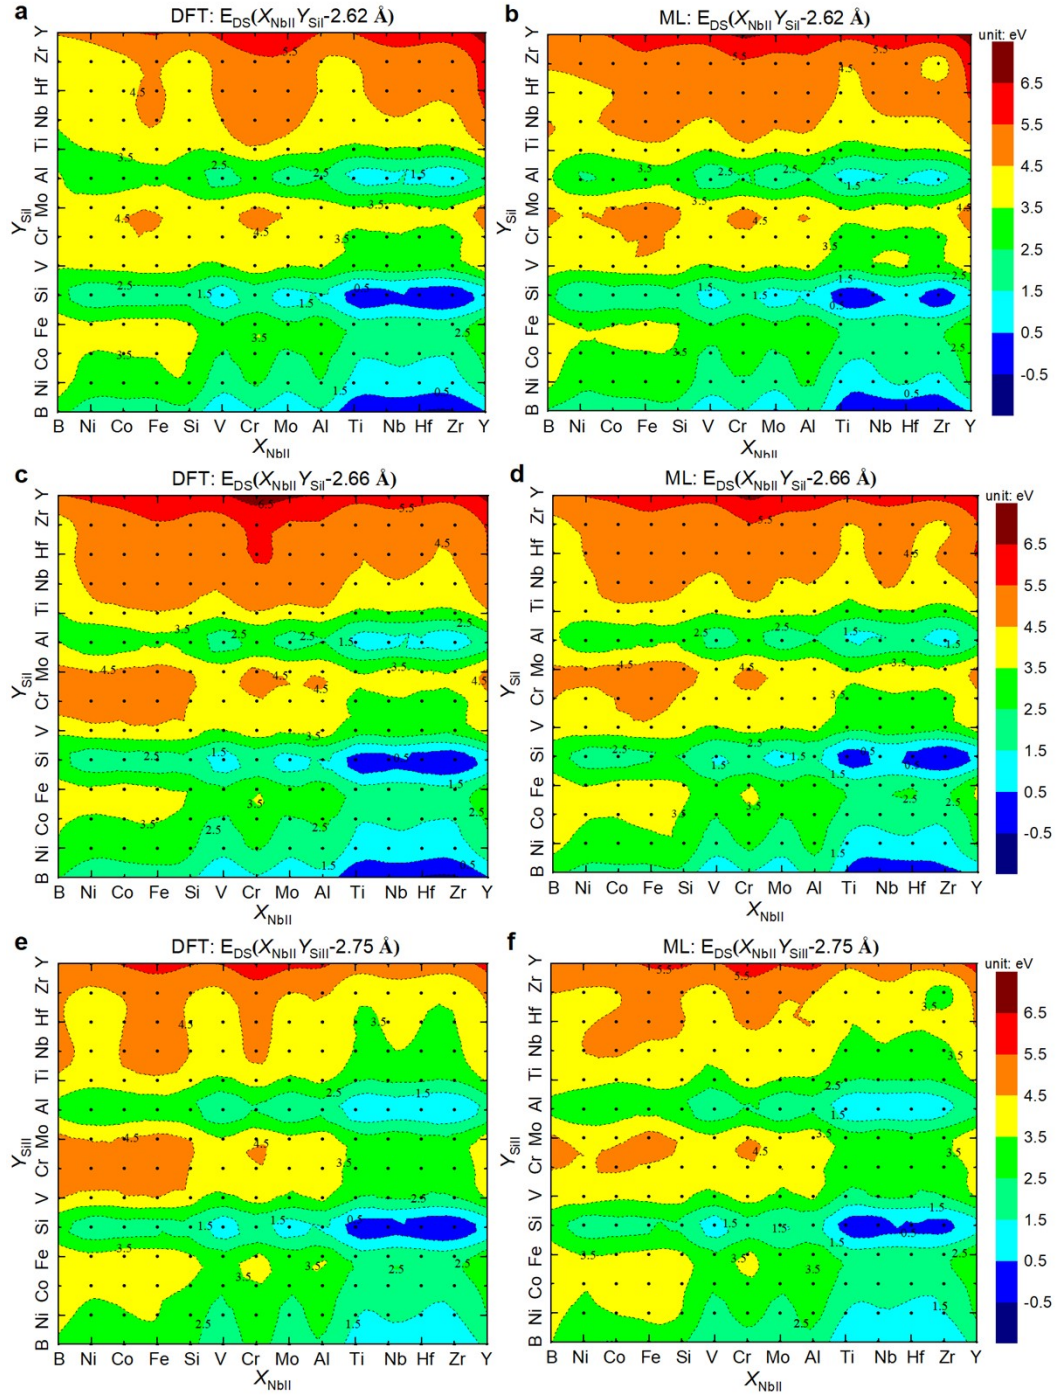

**Fig. S9** Heat maps of  $E_{DS}$  projected on the substitution pair sites containing Nb<sub>II</sub> in  $\alpha$ -Nb<sub>5</sub>Si<sub>3</sub> predicted by (a, c, e) DFT and (b, d, f) ML, respectively.



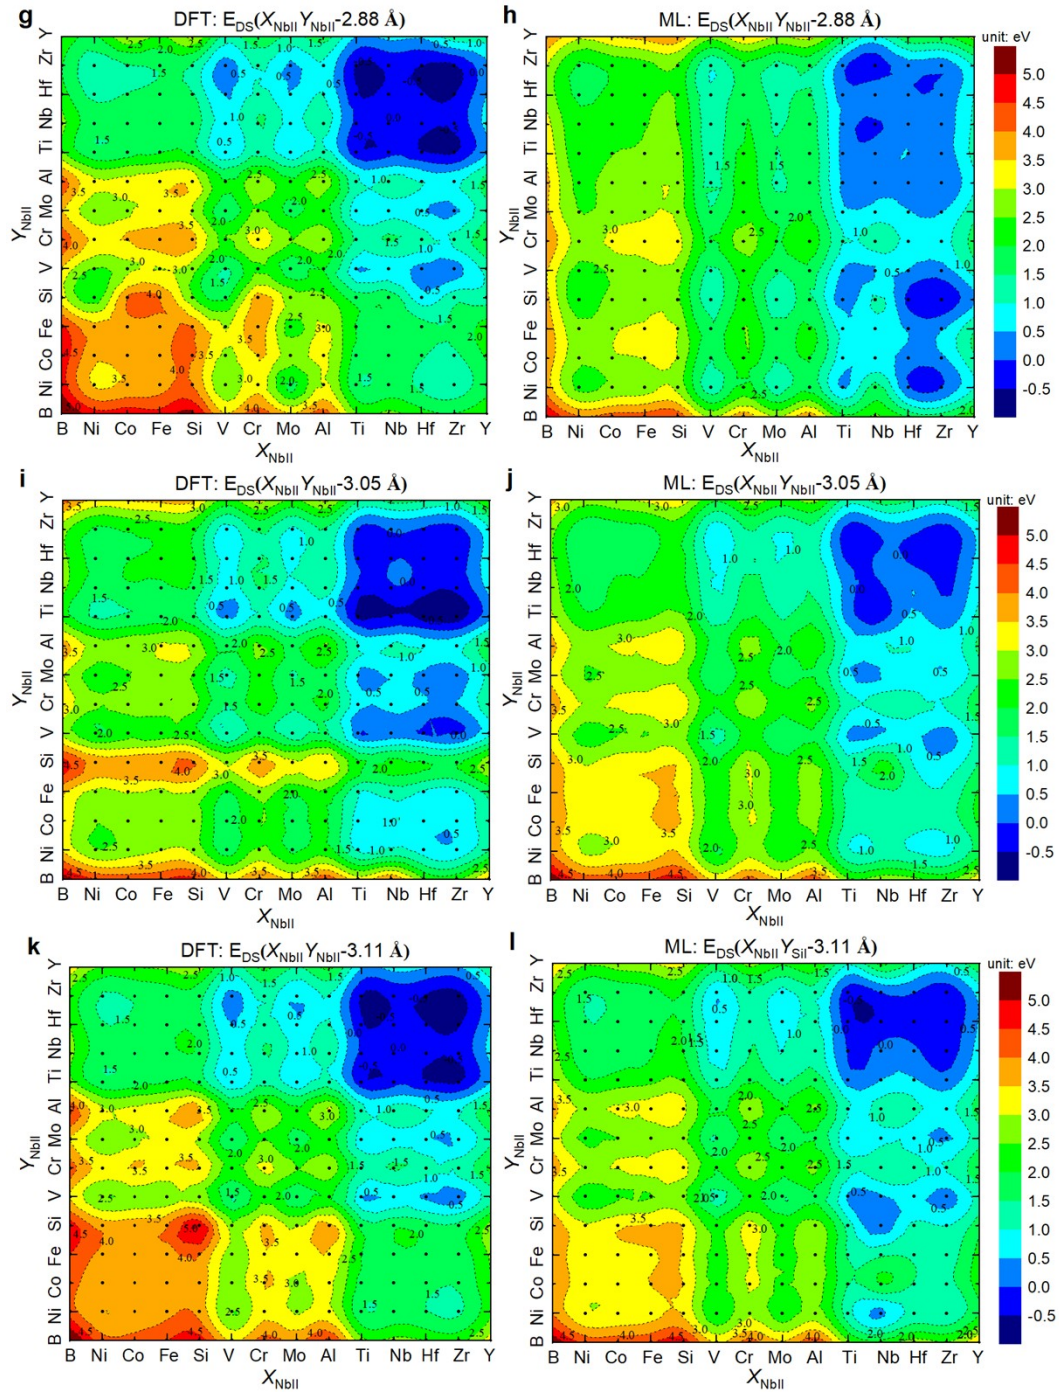

**Fig. S9 (continued)** Heat maps of  $E_{DS}$  projected on the substitution pair sites containing Nb<sub>II</sub> in  $\alpha$ -Nb<sub>5</sub>Si<sub>3</sub> predicted by (g, i, k) DFT and (h, j, l) ML,



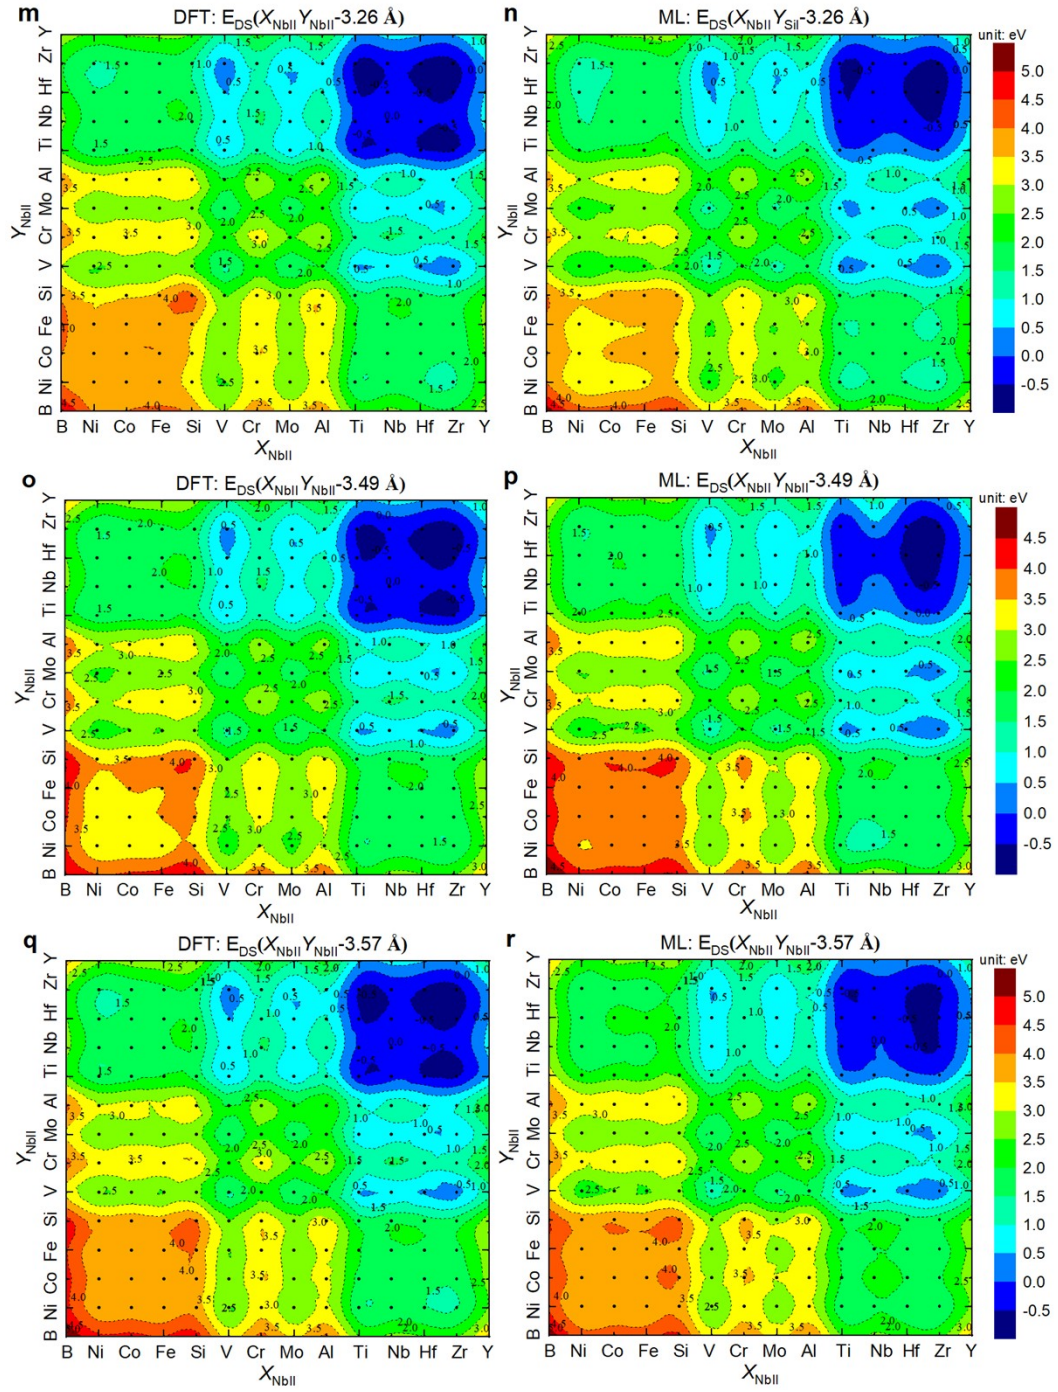

**Fig S9 (continued)** Heat maps of  $E_{DS}$  projected on the substitution pair sites containing  $Nb_{II}$  in  $\alpha-Nb_5Si_3$  predicted by (m, o, q) DFT and (n, p, r) ML, respectively.

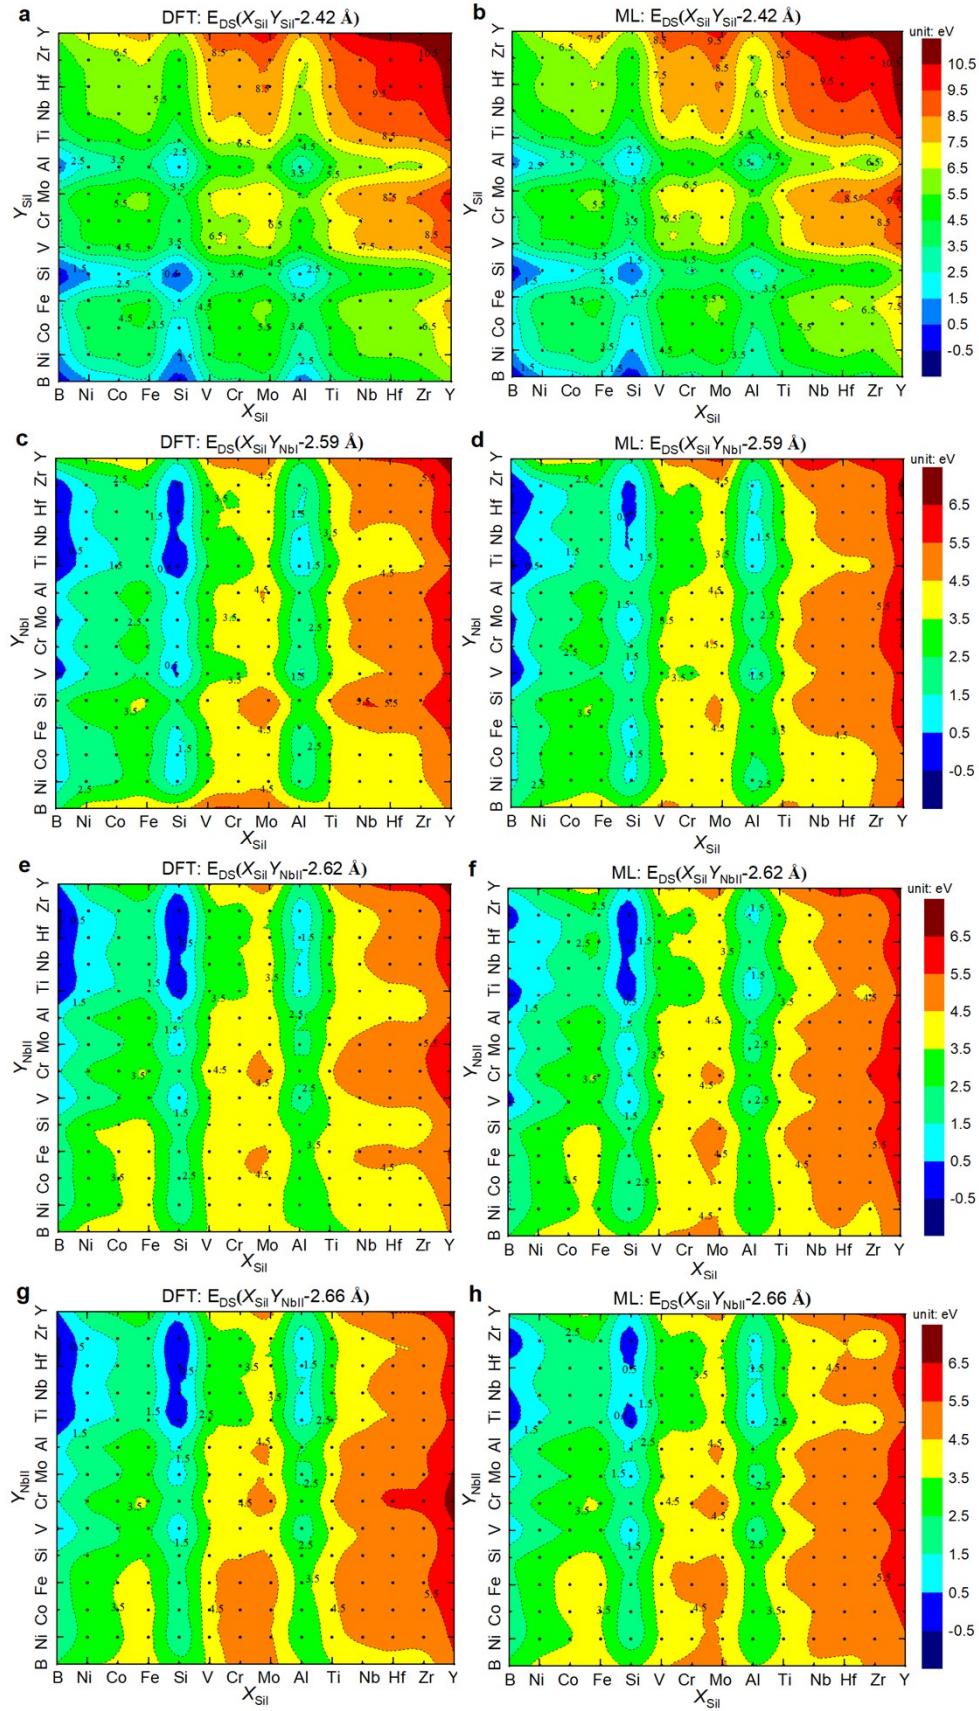

**Fig. S10** Heat maps of  $E_{DS}$  projected on the substitution pair sites containing  $Si_l$  in  $\alpha-Nb_5Si_3$  predicted by (a, c, e, g) DFT and (b, d, f, h) ML, respectively.



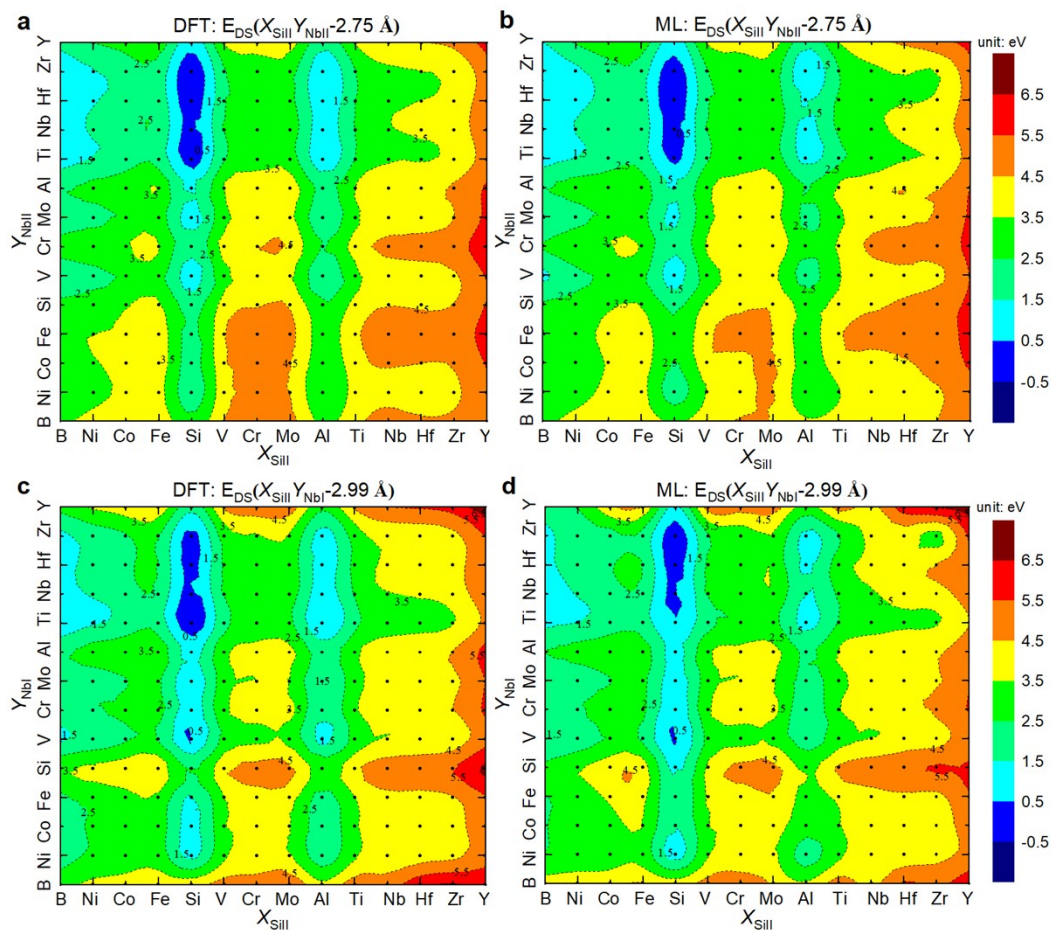

**Fig. S11** Heat maps of  $E_{DS}$  projected on the substitution pair sites containing Si<sub>II</sub> in  $\alpha$ -Nb<sub>5</sub>Si<sub>3</sub> predicted by (a, c) DFT and (b, d) ML, respectively.

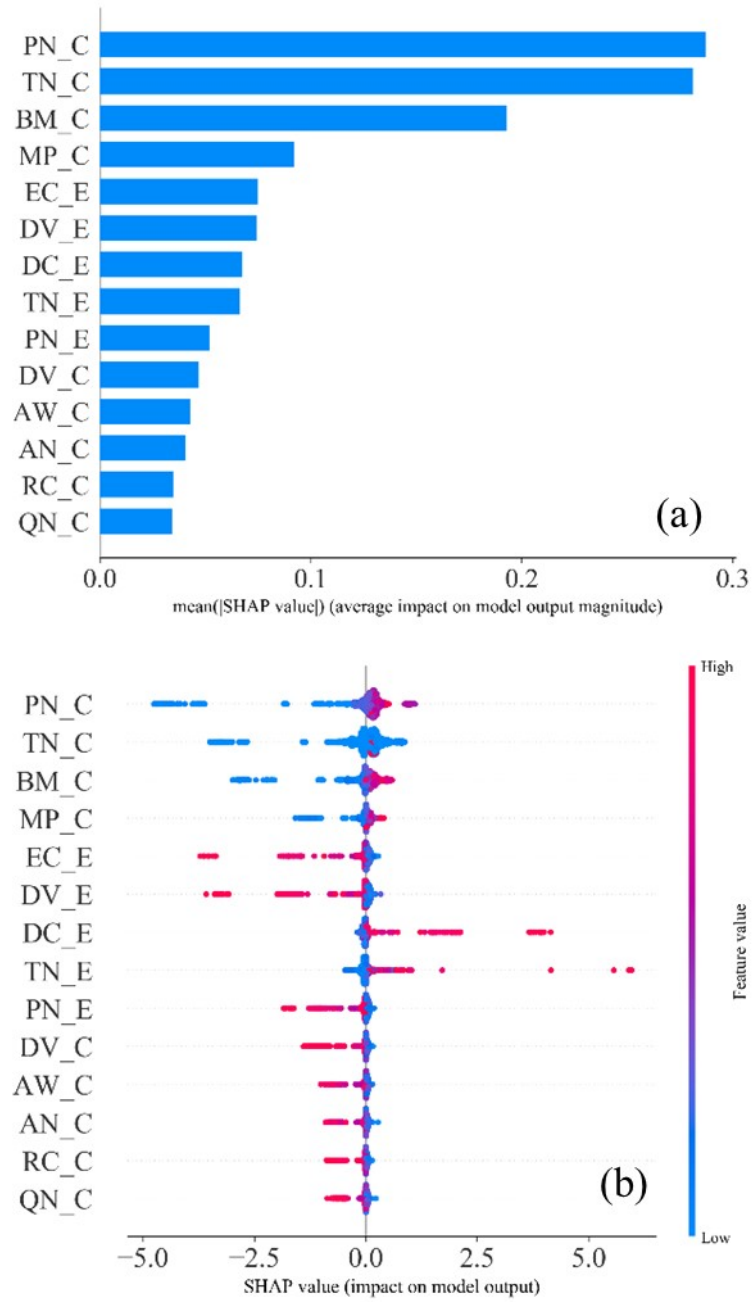

**Fig. S12** Feature analysis of  $E_{DS}$  in  $\alpha\text{-Nb}_5\text{Si}_3$  based on SHAP method. (a) Feature importance ranked by SHAP. (b) SHAP value distribution of different samples.

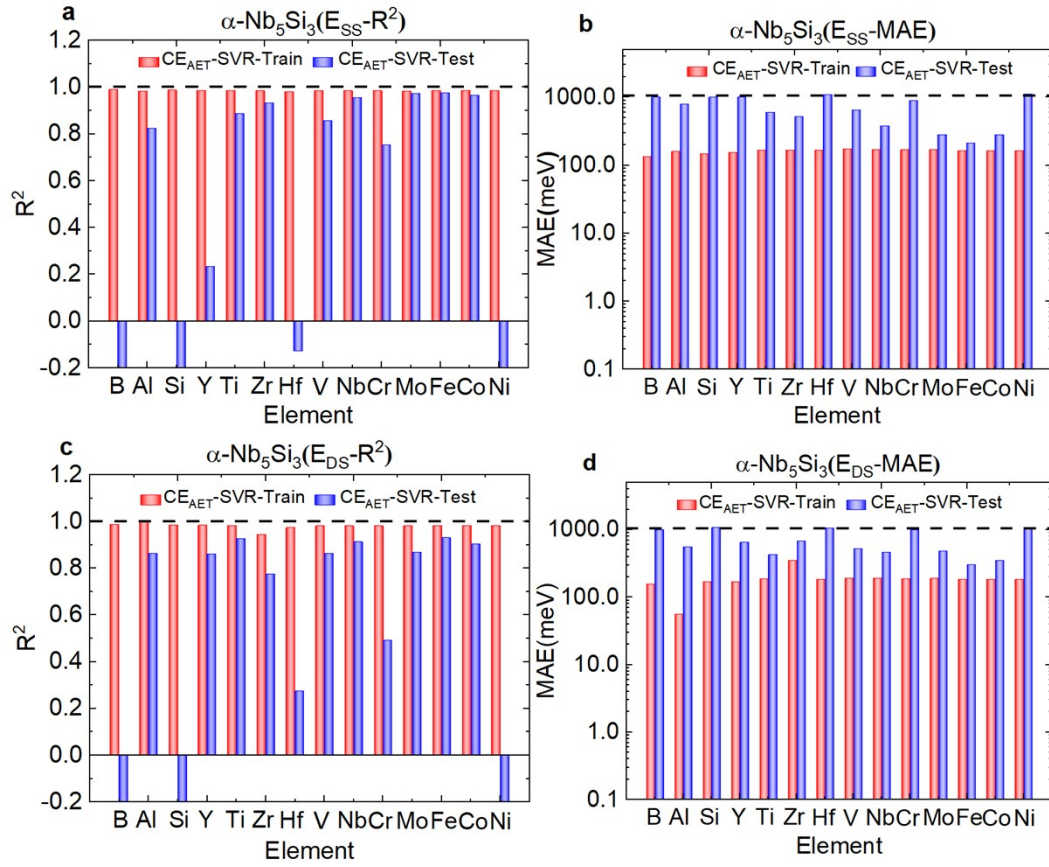

**Fig S13** Performance metrics of CE<sub>AET</sub>-SVR ML models in the leave-p-out cross validation for each of the 14 elements in  $\alpha$ -Nb<sub>5</sub>Si<sub>3</sub> phase: (a, c)  $R^2$  and (b, d) MAE of E<sub>SS</sub> and E<sub>DS</sub>, respectively. The  $R^2$  plot were truncated to -0.2. Both the training and test dataset results are shown for comparison.

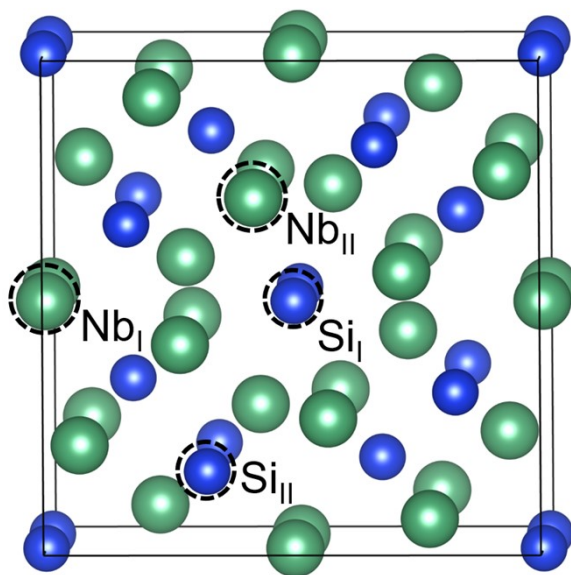

**Fig. S14** Conventional cell of  $\beta$ -Nb<sub>5</sub>Si<sub>3</sub> crystal structure with four non-equivalent sites Nb<sub>I</sub>, Nb<sub>II</sub>, Si<sub>I</sub>, and Si<sub>II</sub>.

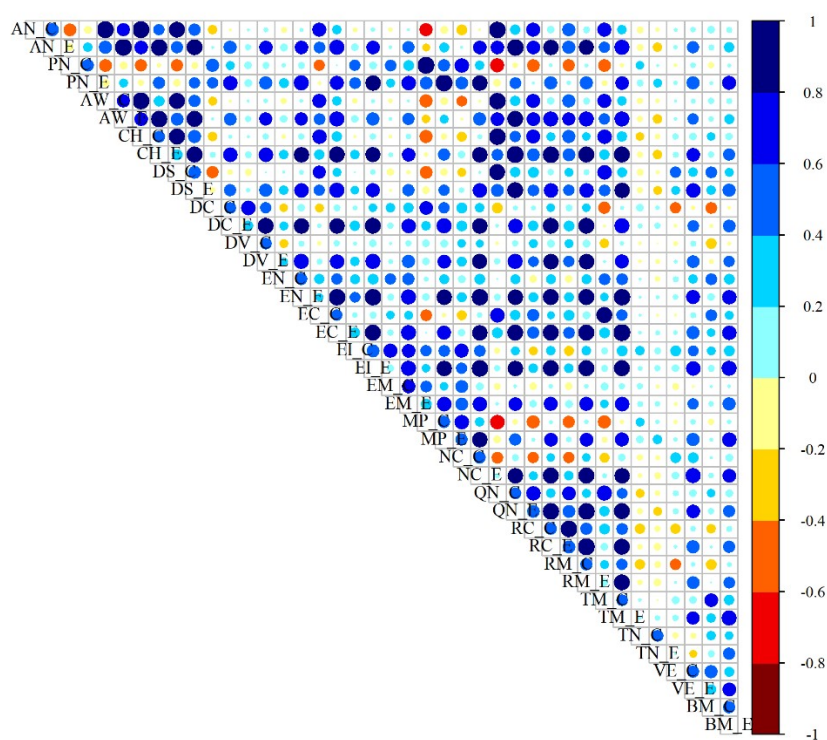

**Fig. S15** Correlation matrix of features related to the machine learning prediction of double-site substitution energy in  $\text{Nb}_5\text{Si}_3$ .

## References

- [1] Kresse G, Furthmuller J. Efficiency of ab-initio total energy calculations for metals and semiconductors using a plane-wave basis set. *Comp Mater Sci* 1996;6:15–50. [https://doi.org/10.1016/0927-0256\(96\)00008-0](https://doi.org/10.1016/0927-0256(96)00008-0).
- [2] Kresse G, Furthmuller J. Efficient iterative schemes for *ab initio* total-energy calculations using a plane-wave basis set. *Phys Rev B* 1996;54:11169–86. <https://doi.org/10.1103/PhysRevB.54.11169>.
- [3] Kresse G, Joubert D. From ultrasoft pseudopotentials to the projector augmented-wave method. *Phys Rev B* 1999;59:1758–75. <https://doi.org/10.1103/PhysRevB.59.1758>.
- [4] Blochl PE. Projector augmented-wave method. *Phys Rev B* 1994;50:17953–79. <https://doi.org/10.1103/PhysRevB.50.17953>.
- [5] Legrain F, Carrete J, Roekeghem AV, Curtarolo S, Mingo N. How the chemical composition alone can predict vibrational free energies and entropies of solids. *Chem Mater* 2017;29.
